# Supplementary material for: Short communication: Increasing vertical attenuation length of cosmogenic nuclide production on steep slopes negates topographic shielding corrections for catchment erosion rates
Source: Copernicus journal article supplement (doi:10.5194/esurf-6-923-2018), 2018-10-17
Supplement: Supplementary file 1 [file esurf-6-923-2018-supplement.zip]

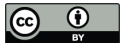

## *Supplement of*

# **Short communication: Increasing vertical attenuation length of cosmogenic nuclide production on steep slopes negates topographic shielding corrections for catchment erosion rates**

**Roman A. DiBiase**

*Correspondence to:* Roman A. DiBiase ([rdibiase@psu.edu](mailto:rdibiase@psu.edu))

- [esurf-6-923-2018-supplement-title-page.pdf](#)
- [IntensityFunction.m](#)
- [ShieldingWrapperScript.m](#)
- [SkylineFunction.m](#)
- [readme.txt](#)

The copyright of individual parts of the supplement might differ from the CC BY 4.0 License.
